# Supplementary material
Source: MDPI journal article supplement (https://www.mdpi.com/2571-6131/6/3/97)
Supplement: s1 [file s1 › ceramics-2494855-supplementary.pdf]

# Bismuth-Germanate Glasses: Synthesis, Structure, Luminescence, and Crystallization

Ksenia Serkina <sup>1</sup>, Irina Stepanova <sup>1</sup>, Aleksandr Pynenkov <sup>2</sup>, Maria Uslamina <sup>2</sup>, Konstantin Nishchev <sup>2</sup>, Kirill Boldyrev <sup>3</sup>, Roman Avetisov <sup>1</sup> and Igor Avetisov <sup>1,\*</sup>

<sup>1</sup> Department of Chemistry and Technology of Crystals, D. Mendeleev University of Chemical Technology of Russia (MUCTR), 125480 Moscow, Russia; serkina.k.v@muctr.ru (K.S.); stepanova.i.v@muctr.ru (I.S.); armoled@mail.ru (R.A.)

<sup>2</sup> Institute of High Technologies and New Materials, National Research Mordovia State University, 430005 Saransk, Russia; alekspyn@yandex.ru (A.P.); uslaminam@mail.ru (M.U.); nishchev@inbox.ru (K.N.)

<sup>3</sup> Laboratory of Fourier-Spectroscopy, Institute for Spectroscopy RAS, 108840 Troitsk, Russia; kn.boldyrev@gmail.com

\* Correspondence: avetisov.i.k@muctr.ru

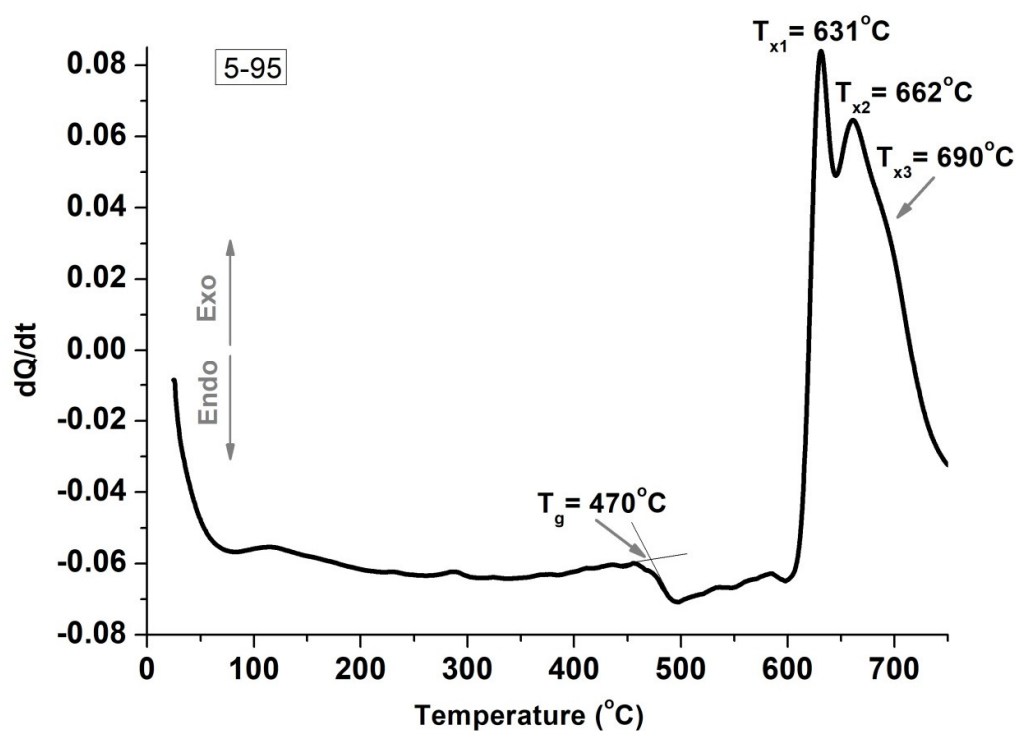

**Figure S1.** DSC curve of synthesized 5-95 glass.

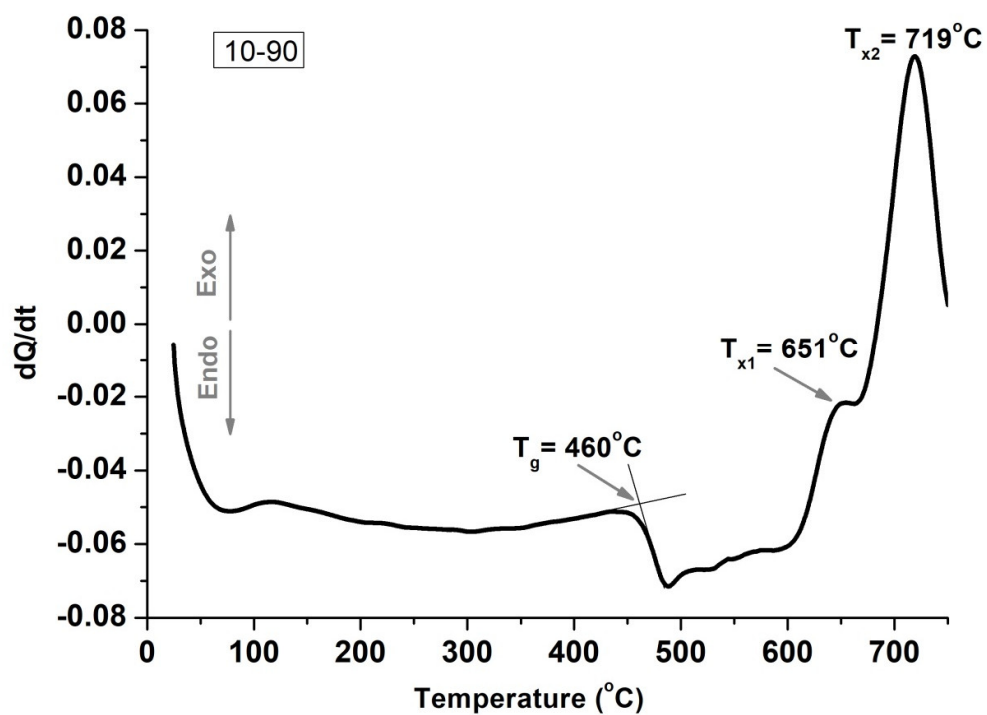

Figure S2. DSC curve of synthesized 10-90 glass.

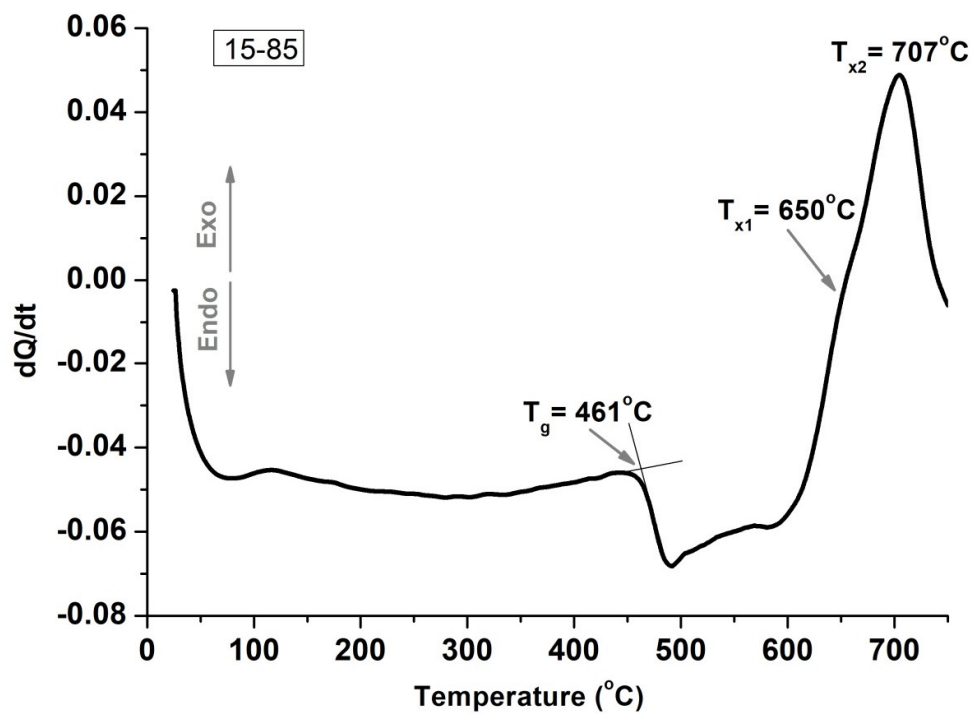

Figure S3. DSC curve of synthesized 15-85 glass.

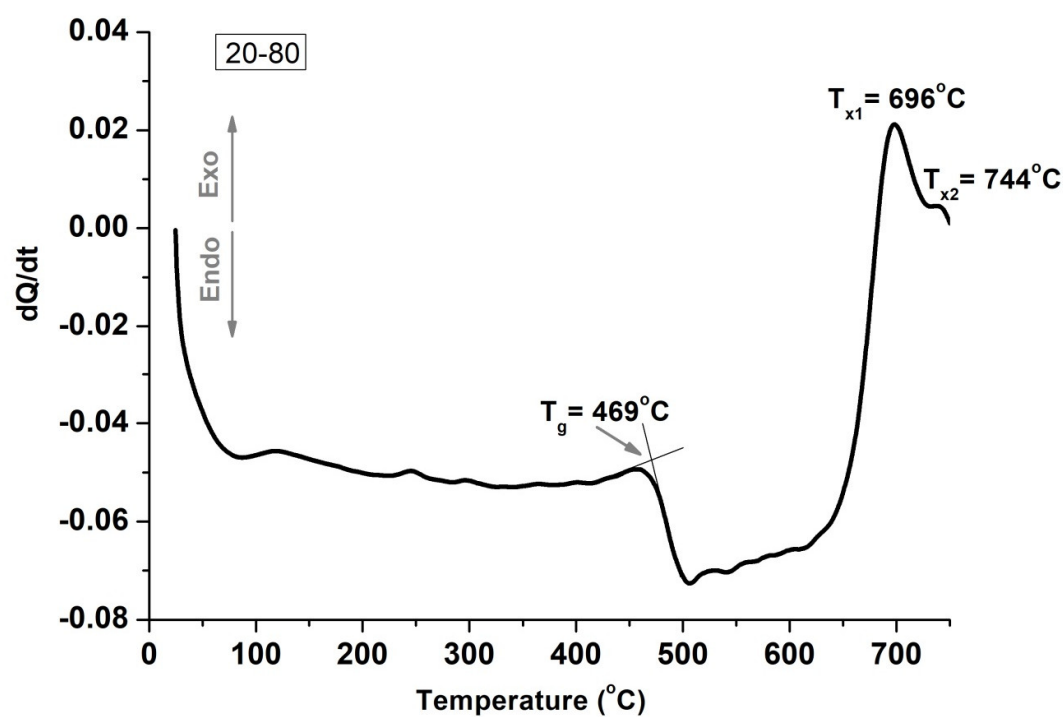

Figure S4. DSC curve of synthesized 20-80 glass.

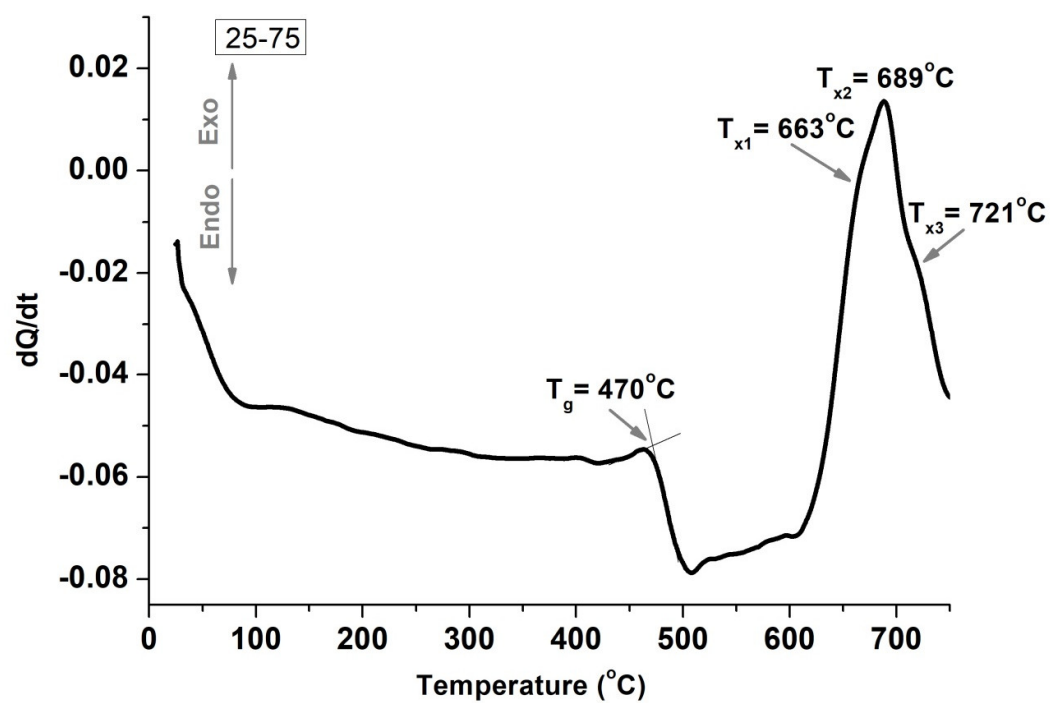

Figure S5. DSC curve of synthesized 25-75 glass.

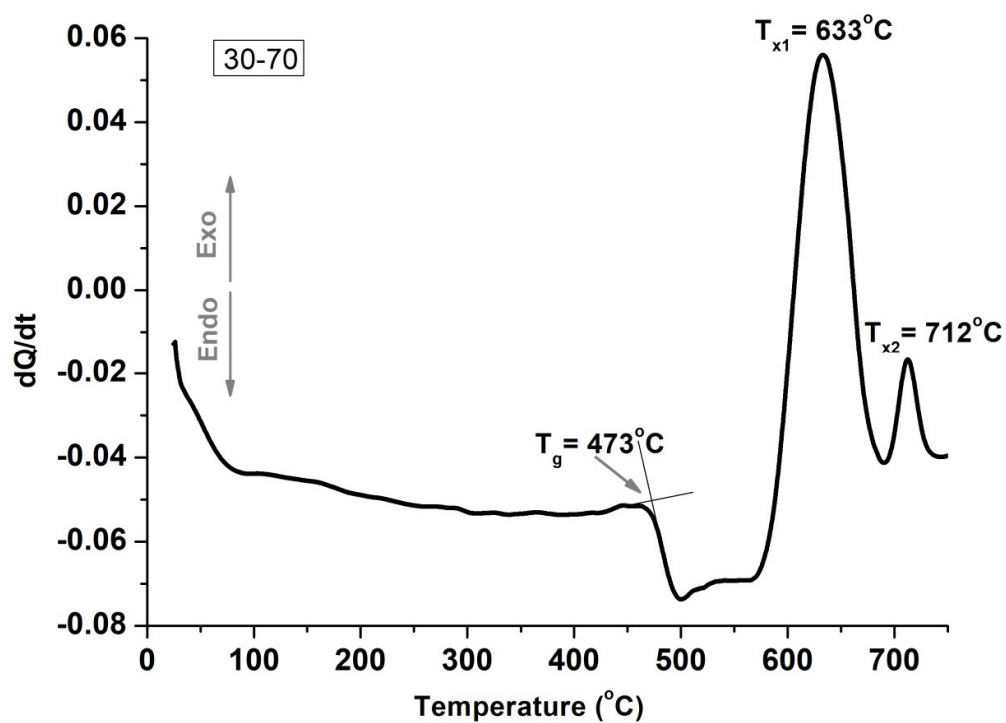

Figure S6. DSC curve of synthesized 30-70 glass.

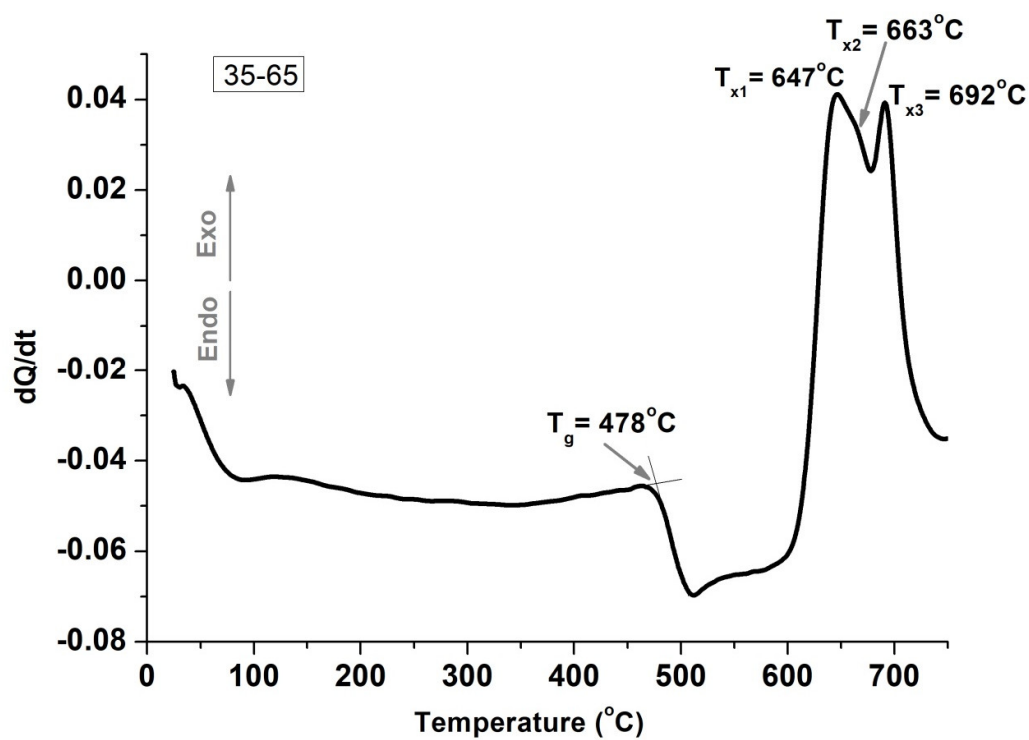

Figure S7. DSC curve of synthesized 35-75 glass.

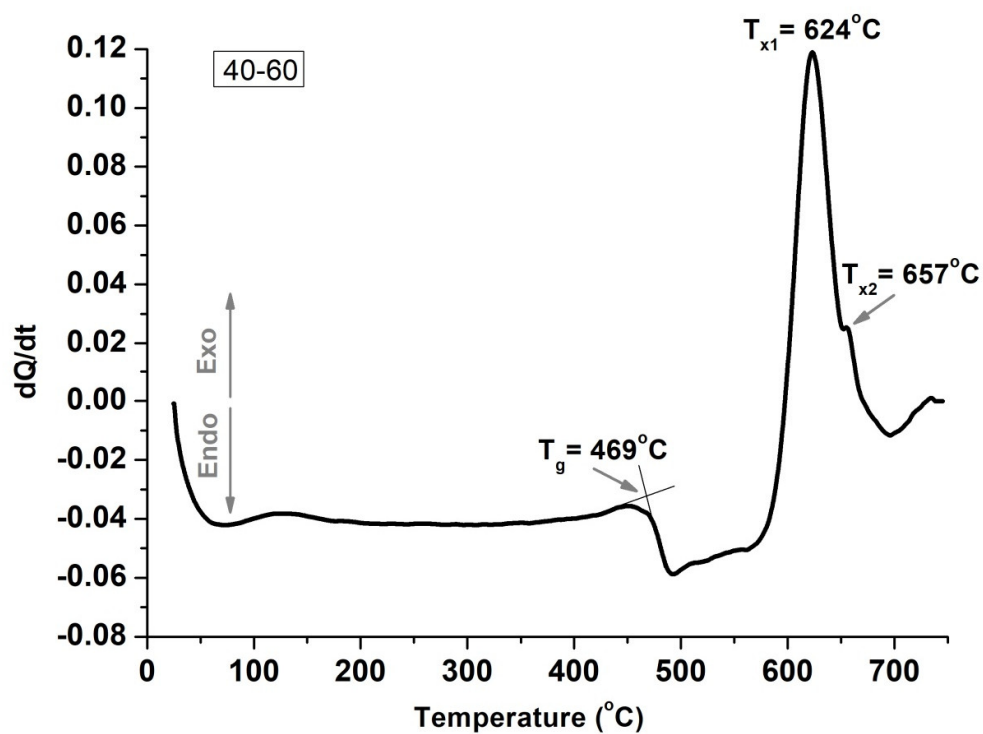

Figure S8. DSC curve of synthesized 40-60 glass.

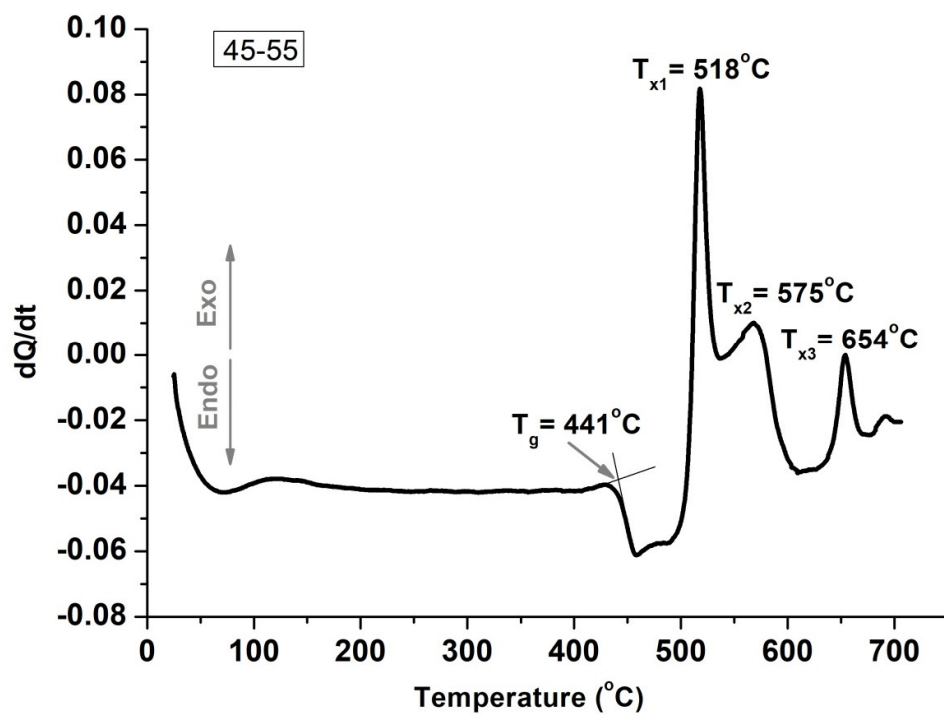

Figure S9. DSC curve of synthesized 45-55 glass.

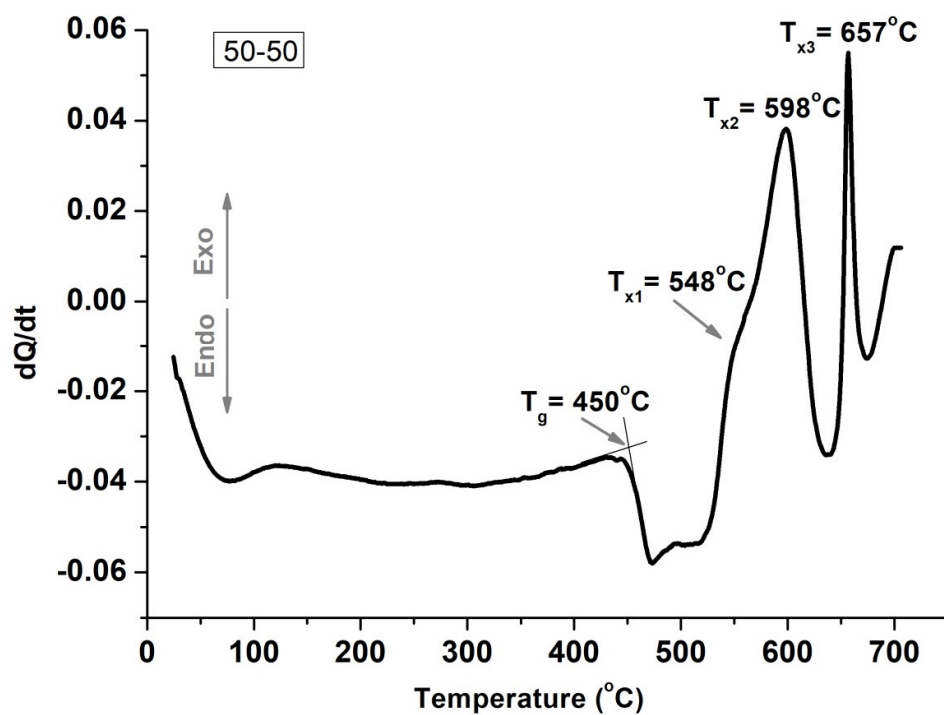

Figure S10. DSC curve of synthesized 50-50 glass.

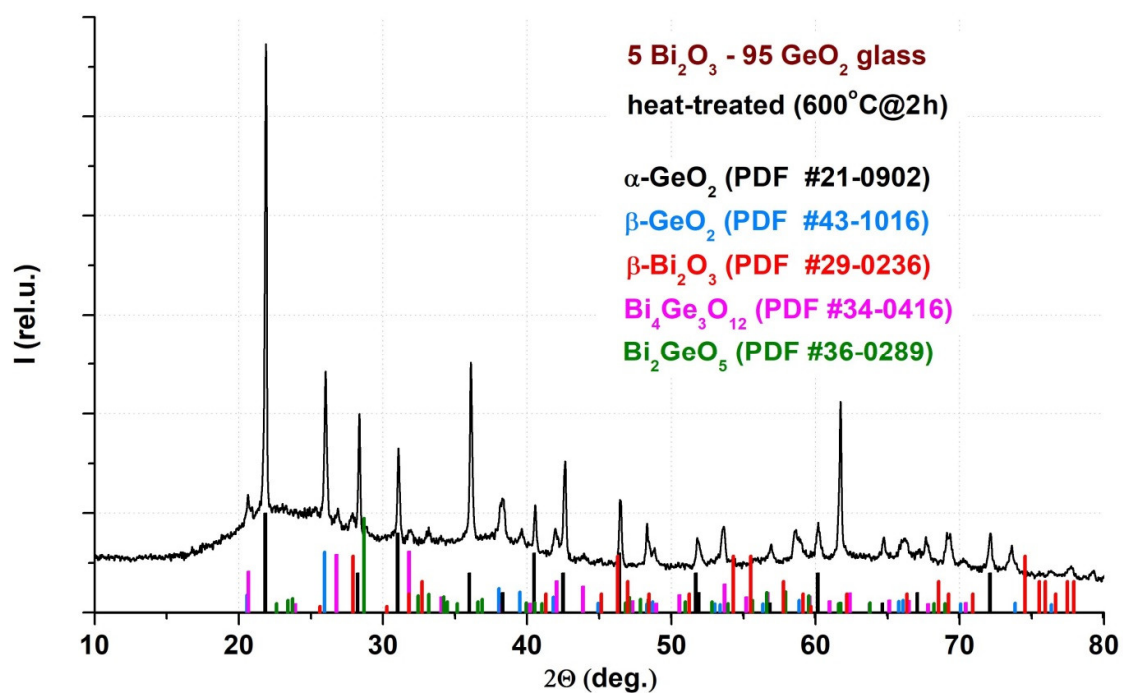

Figure S11. XRD patterns of 5-95 glass heat-treated at  $600^{\circ}\text{C}$ .

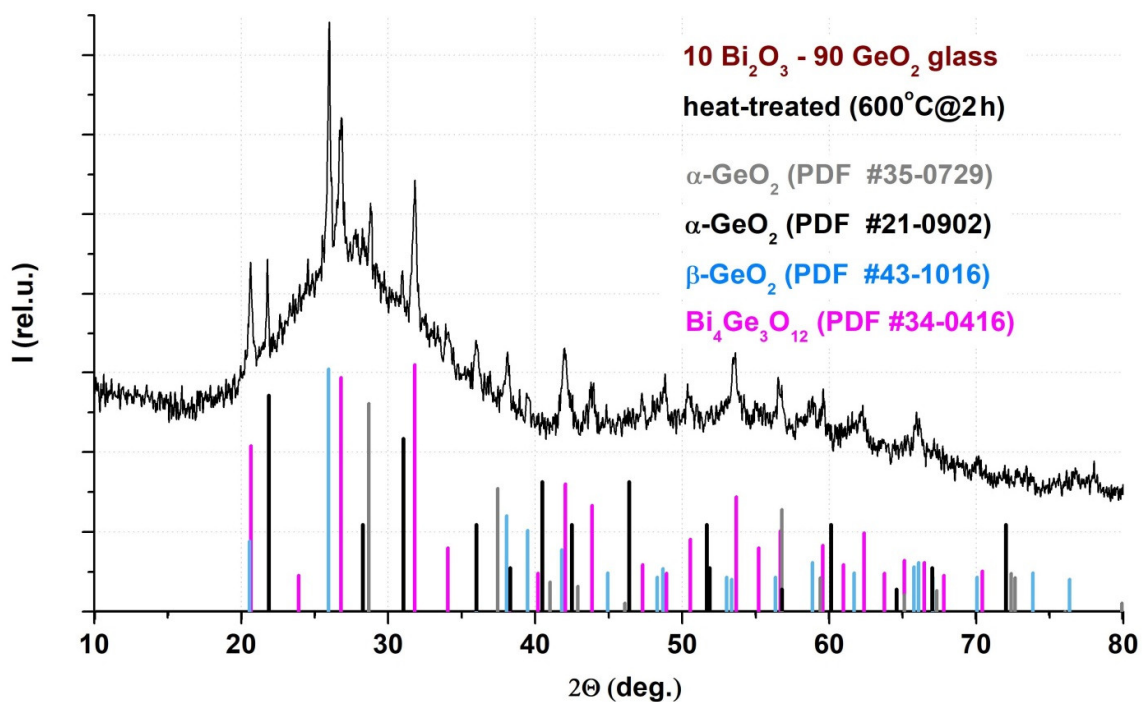

Figure S12. XRD patterns of 10-90 glass heat-treated at 600°C.

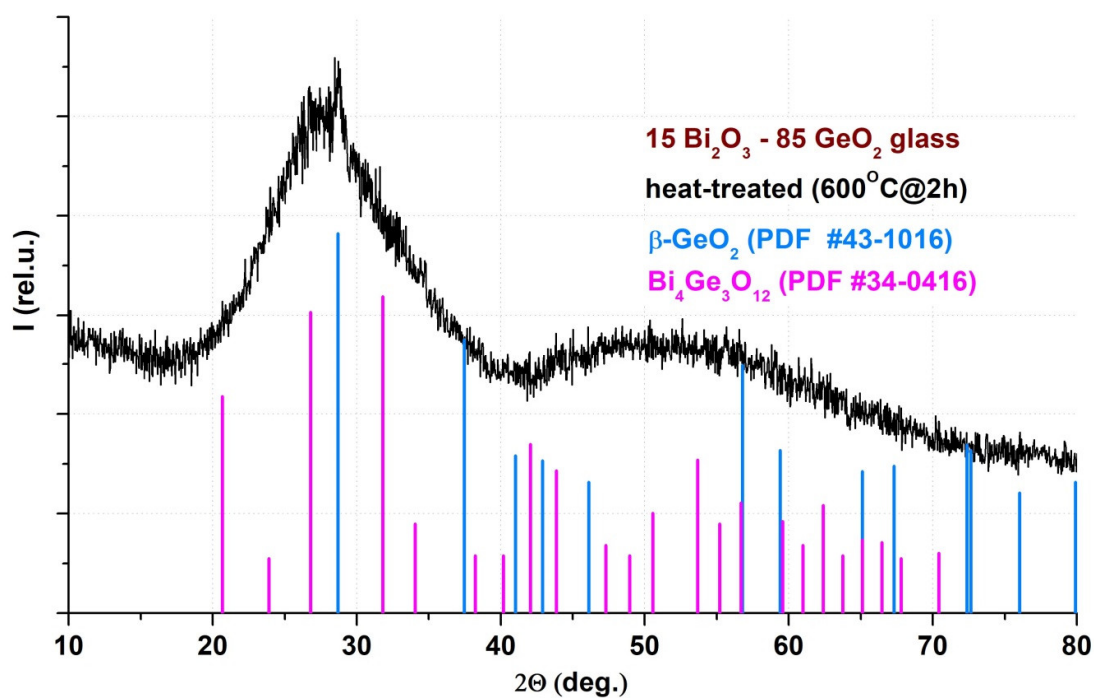

Figure S13. XRD patterns of 15-85 glass heat-treated at 600°C.

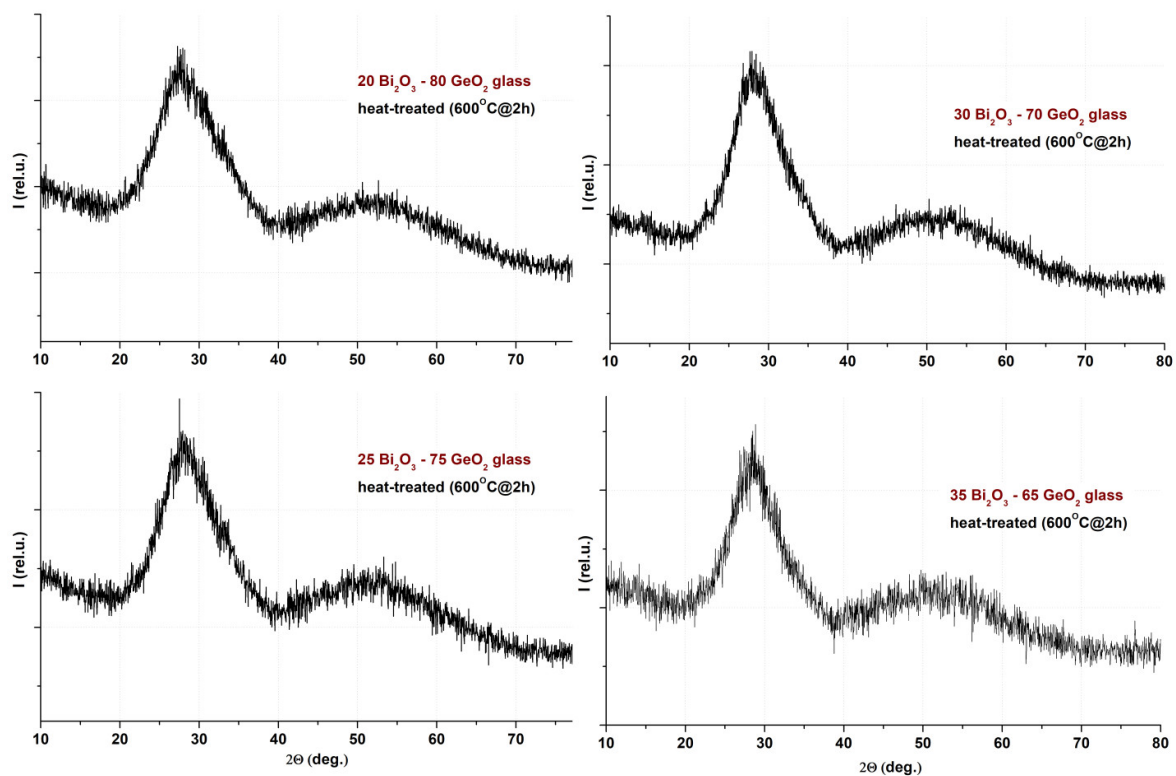

Figure S14. XRD patterns of 20-80, 25-75, 30-70, 35-65 glasses heat-treated at  $600^\circ\text{C}$ .

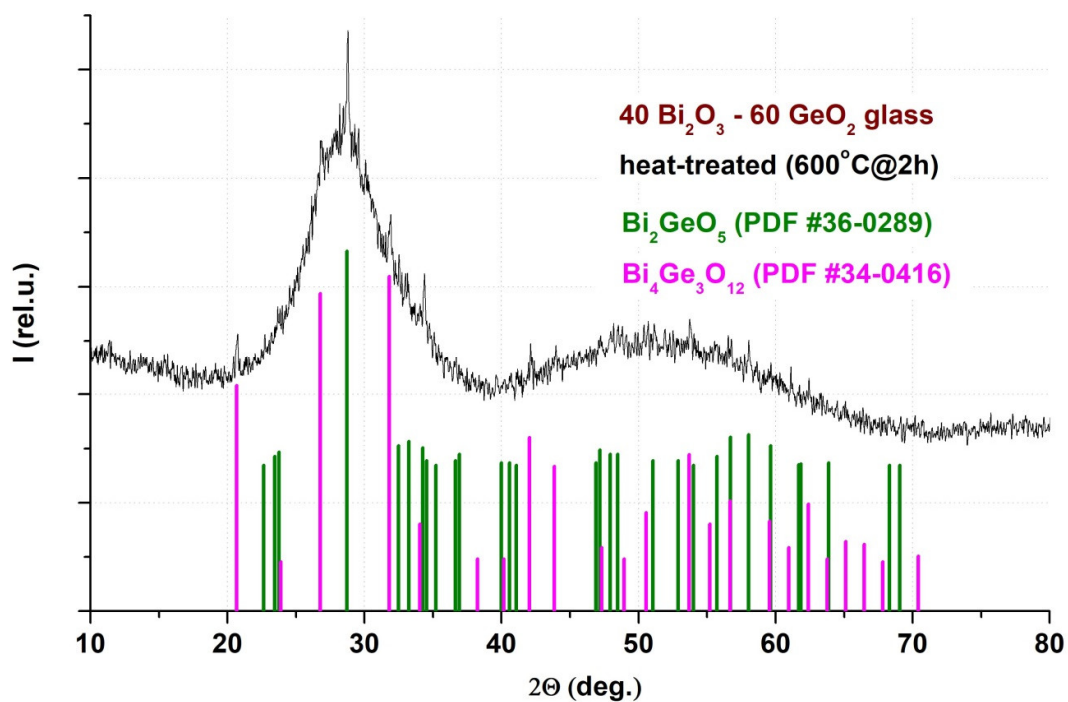

Figure S15. XRD patterns of 40-60 glass heat-treated at  $600^\circ\text{C}$ .

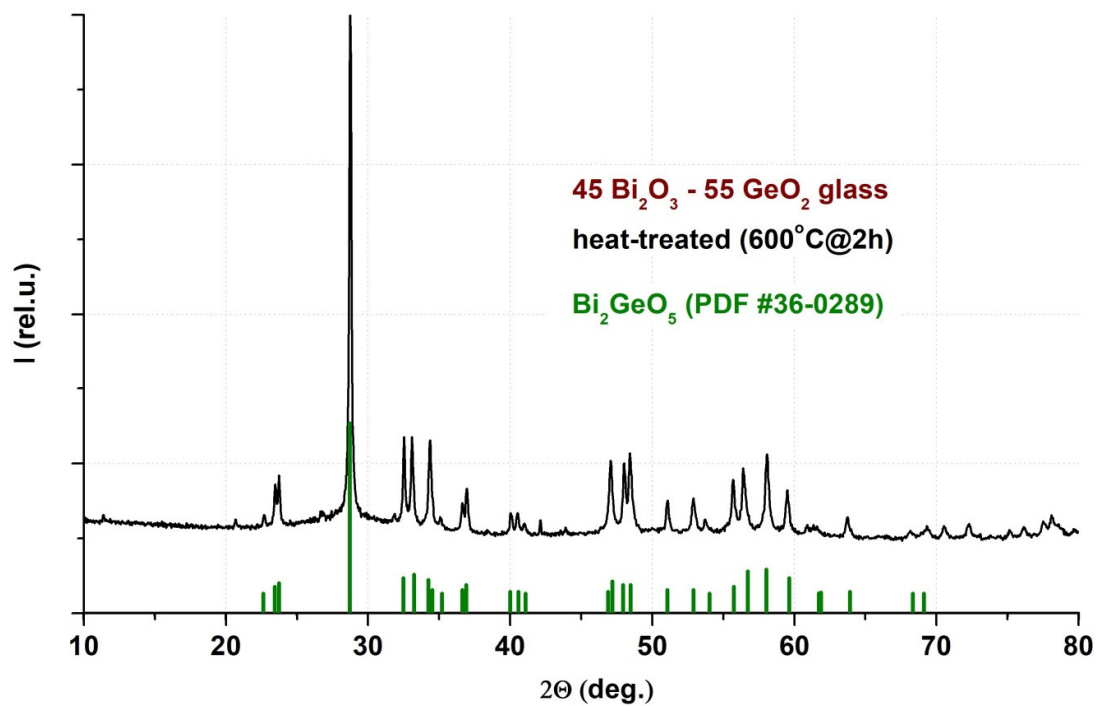

Figure S16. XRD patterns of 45-55 glass heat-treated at 600°C.

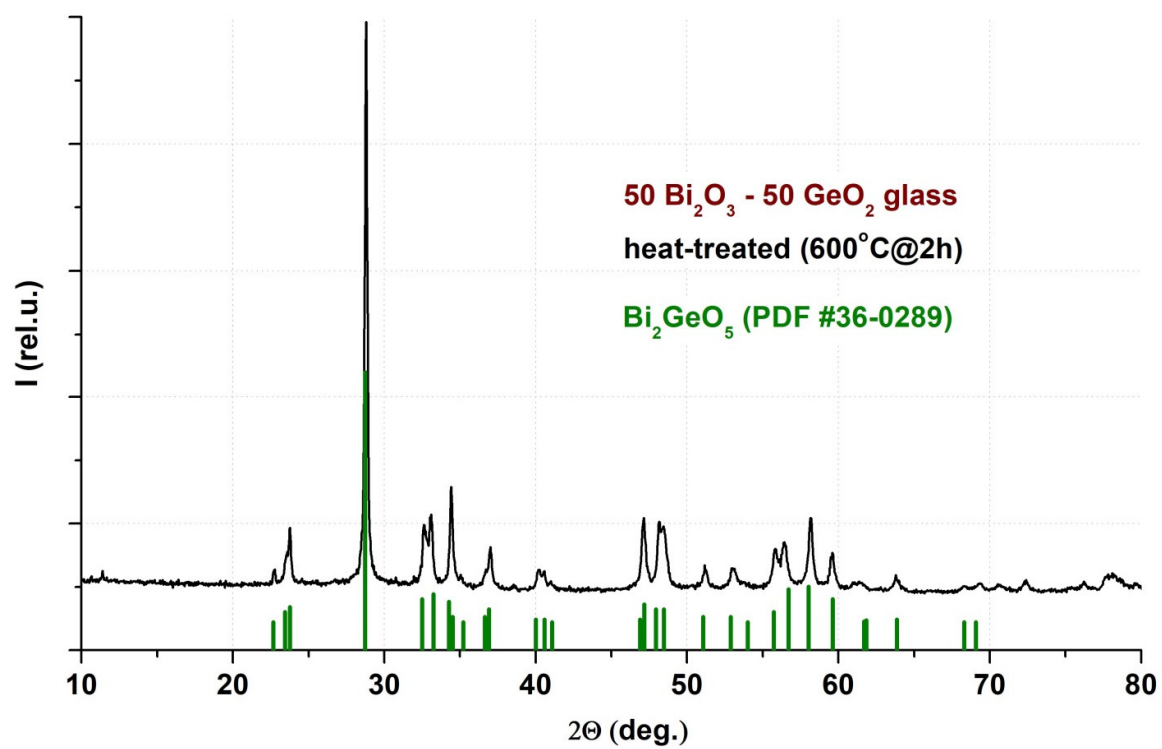

Figure S17. XRD patterns of 50-50 glass heat-treated at 600°C.

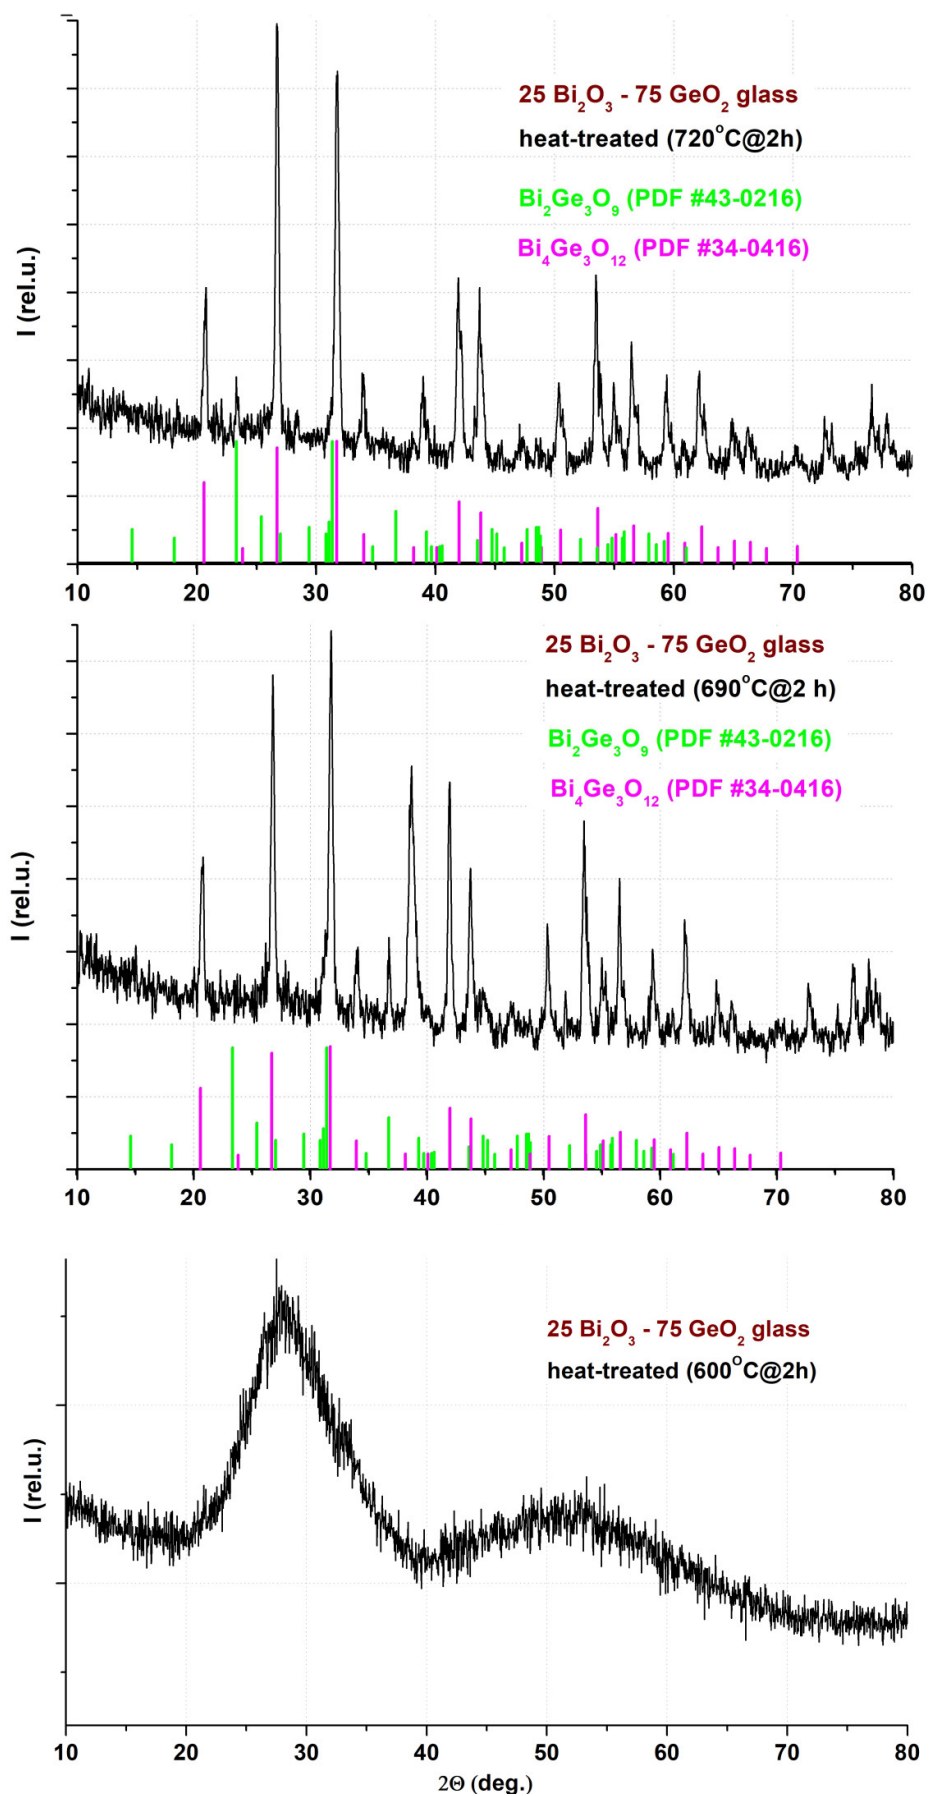

Figure S18. XRD patterns of 25-75 glass heat-treated at 600, 690, 720°C.

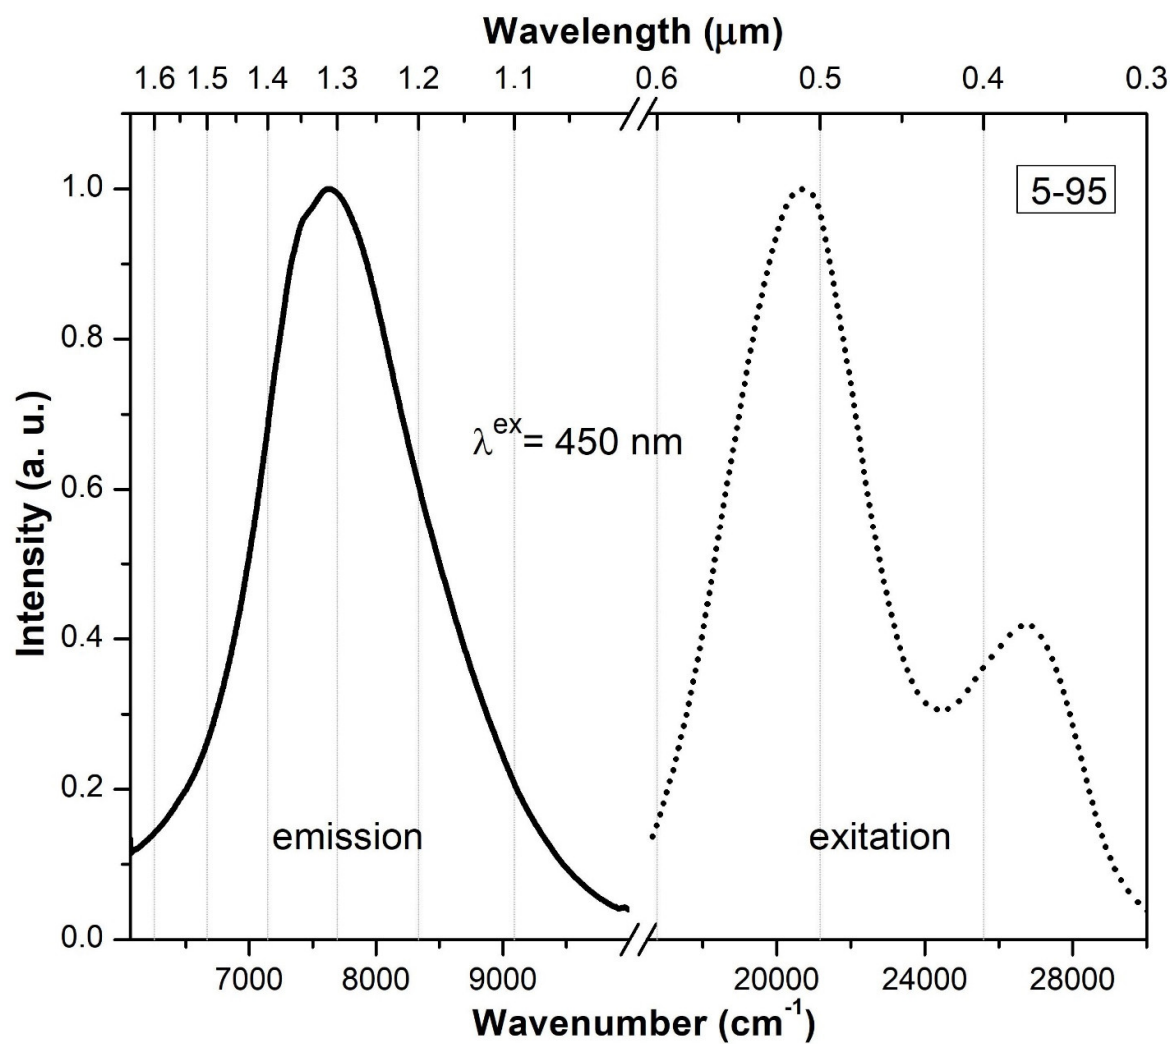

**Figure S19.** Excitation and emission spectra of 5-95 glass ( $\lambda^{\text{ex}}=450 \text{ nm}$ ).
